# Supplementary material
Source: PubMed Central journal article supplement (PMC4893026)
Supplement: NIHMS789420-supplement-Supplemental_Figure_1.pdf [file NIHMS789420-supplement-Supplemental_Figure_1.pdf]

Mora-Blanco, et. al.  
Supplemental Figure 1

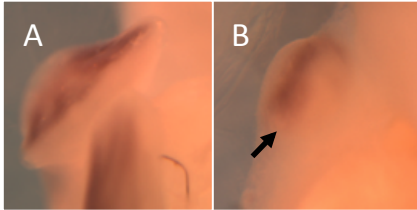

**Supplemental Figure 1:** RNA *in situ* hybridization against *Lmx1b* in control and *Snf5*<sup>ΔΔ</sup> embryos. In the control limbs (A) *Lmx1b* is restricted to the dorsal mesenchyme, but in *Snf5*<sup>ΔΔ</sup> limbs it is expanded into the ventral mesenchyme.
