# Supplementary material
Source: PubMed Central journal article supplement (PMC4893026)
Supplement: NIHMS789420-supplement-Supplemental_Figure_2.pdf [file NIHMS789420-supplement-Supplemental_Figure_2.pdf]

Mora-Blanco, et. al.  
Supplemental Figure 2

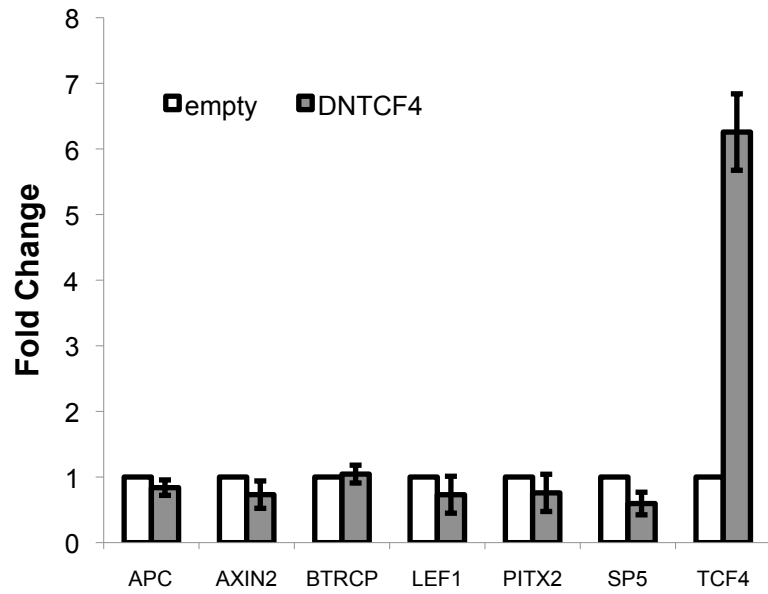

**Supplemental Figure 2:** Expression of  $\beta$ -catenin/TCF targets in response to dominant negative TCF4 expression in MRT G401 cell line.
