# Supplementary material
Source: PubMed Central journal article supplement (PMC4893026)
Supplement: NIHMS789420-supplement-Supplemental_Figure_3.pdf [file NIHMS789420-supplement-Supplemental_Figure_3.pdf]

Mora-Blanco, et. al.  
Supplemental Figure 3

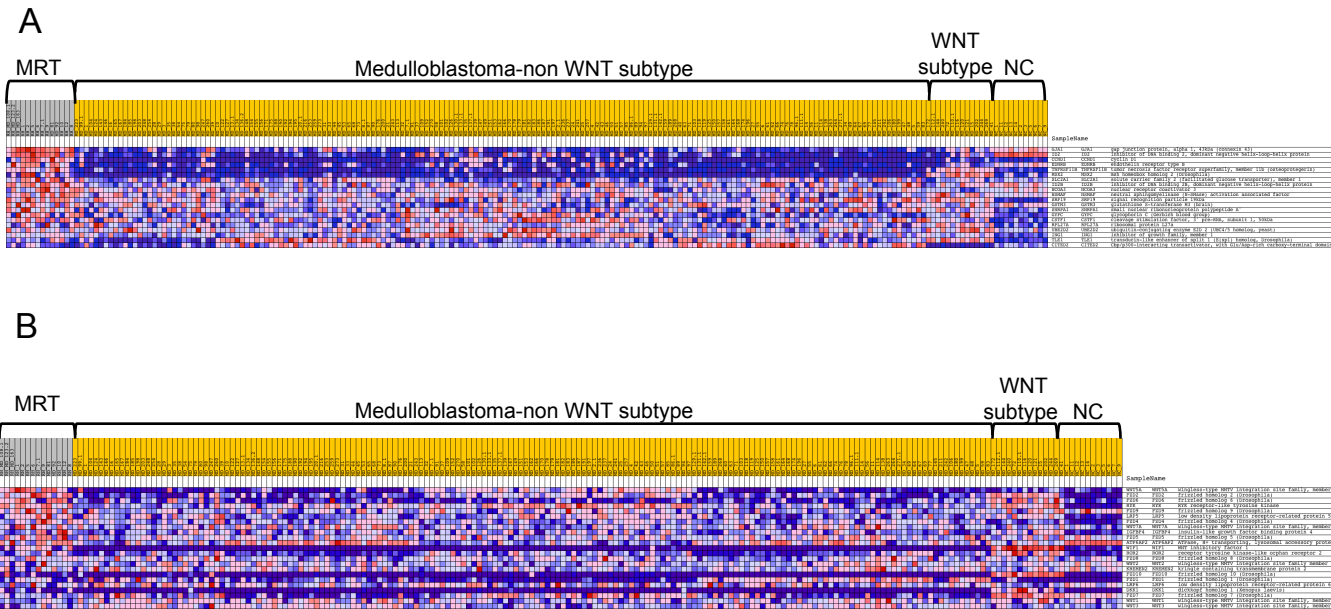

**Supplemental Figure 3:** GSEA Heatmap corresponding to data plots in Figure 2. Heatmap from gene signature derived from Willert *et. al* (35) (A). Heatmap from gene signature derived from Schaefer *et. al.* (36) (B). Samples are malignant rhabdoid tumors (MRT), Medulloblastomas without a WNT subtype, “WNT subtype” medulloblastomas (WNT subtype), and normal cerebellum (NC). Red corresponds to an increased expression, while blue corresponds to decreased expression.
