# Supplementary material
Source: PubMed Central journal article supplement (PMC4893026)
Supplement: NIHMS789420-supplement-Supplemental_Figure_4.pdf [file NIHMS789420-supplement-Supplemental_Figure_4.pdf]

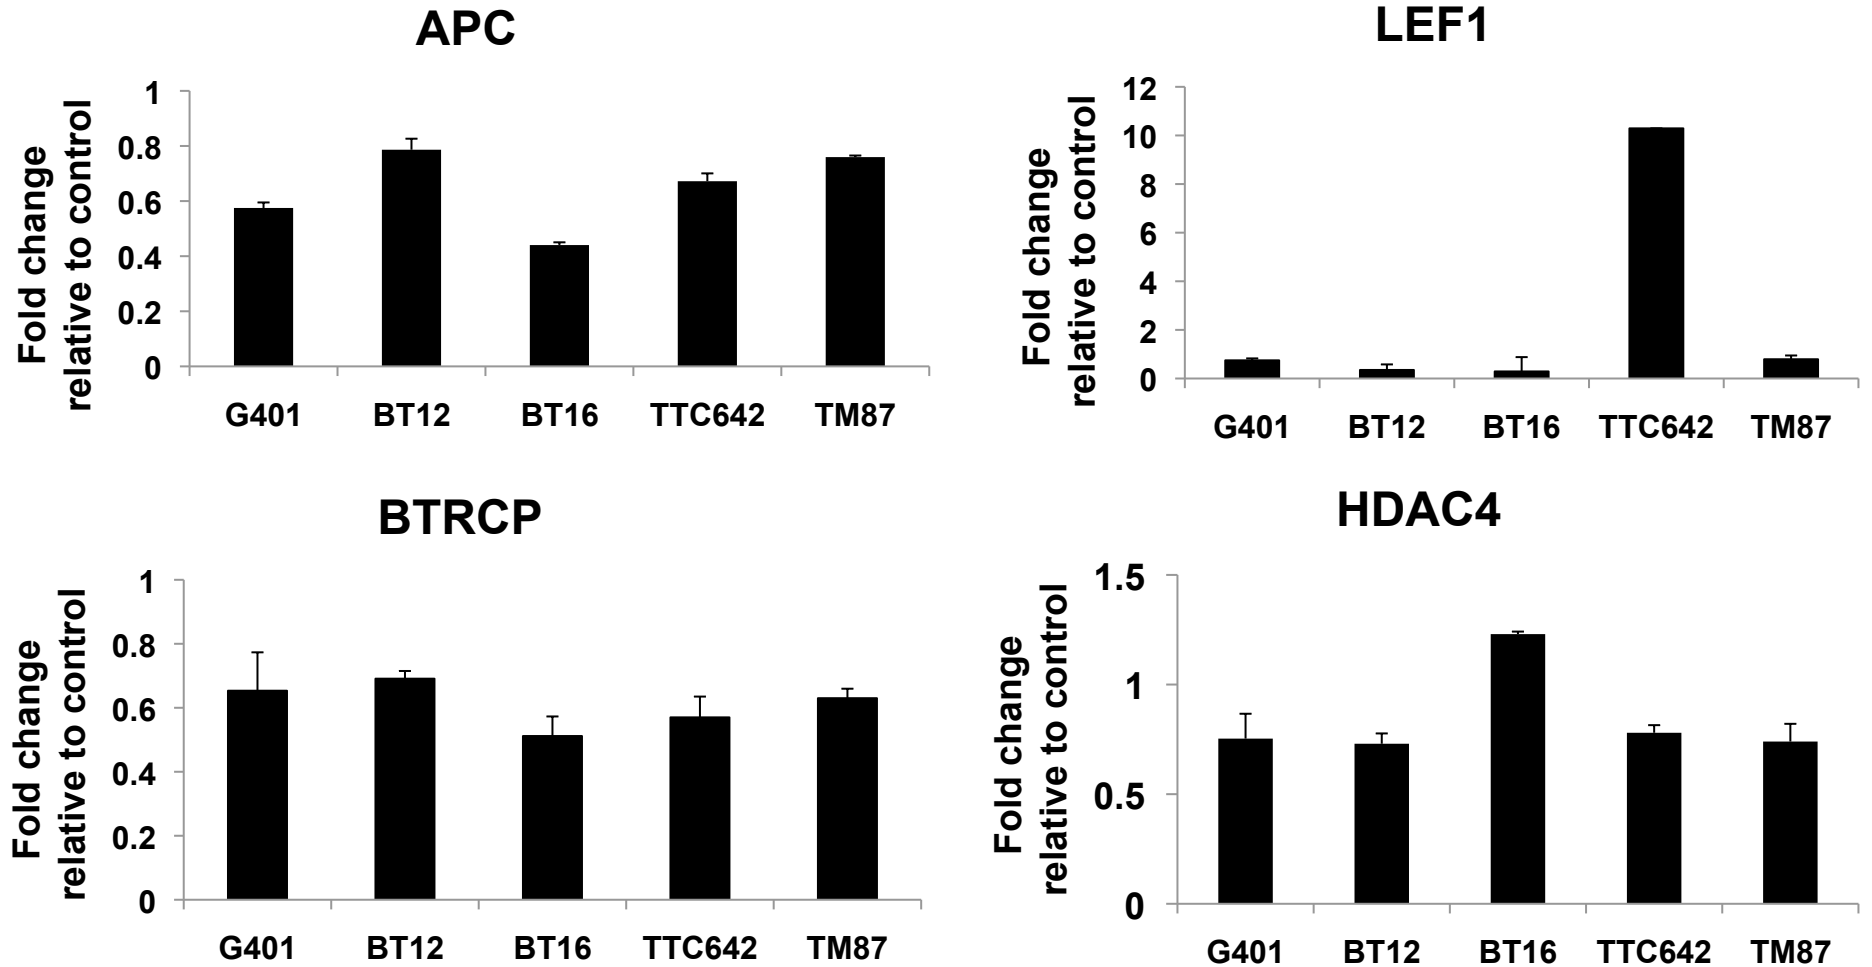

**Supplemental Figure 4 :** Expression of  $\beta$ -catenin/TCF targets in MRT cell lines. Expression of *APC*, *BTRCP*, *LEF1* , and *HDAC4* in G401, BT12, BT16, TTC642 , and TM87 cells after SNF5 re-introduction.
